# Supplementary material
Source: publisher figshare collection journal article supplement (https://aacr.figshare.com/articles/dataset/_/23905301)

**Supplemental Figure 15.** Genes with increased dependency in cell lines with del(1p) [part A]

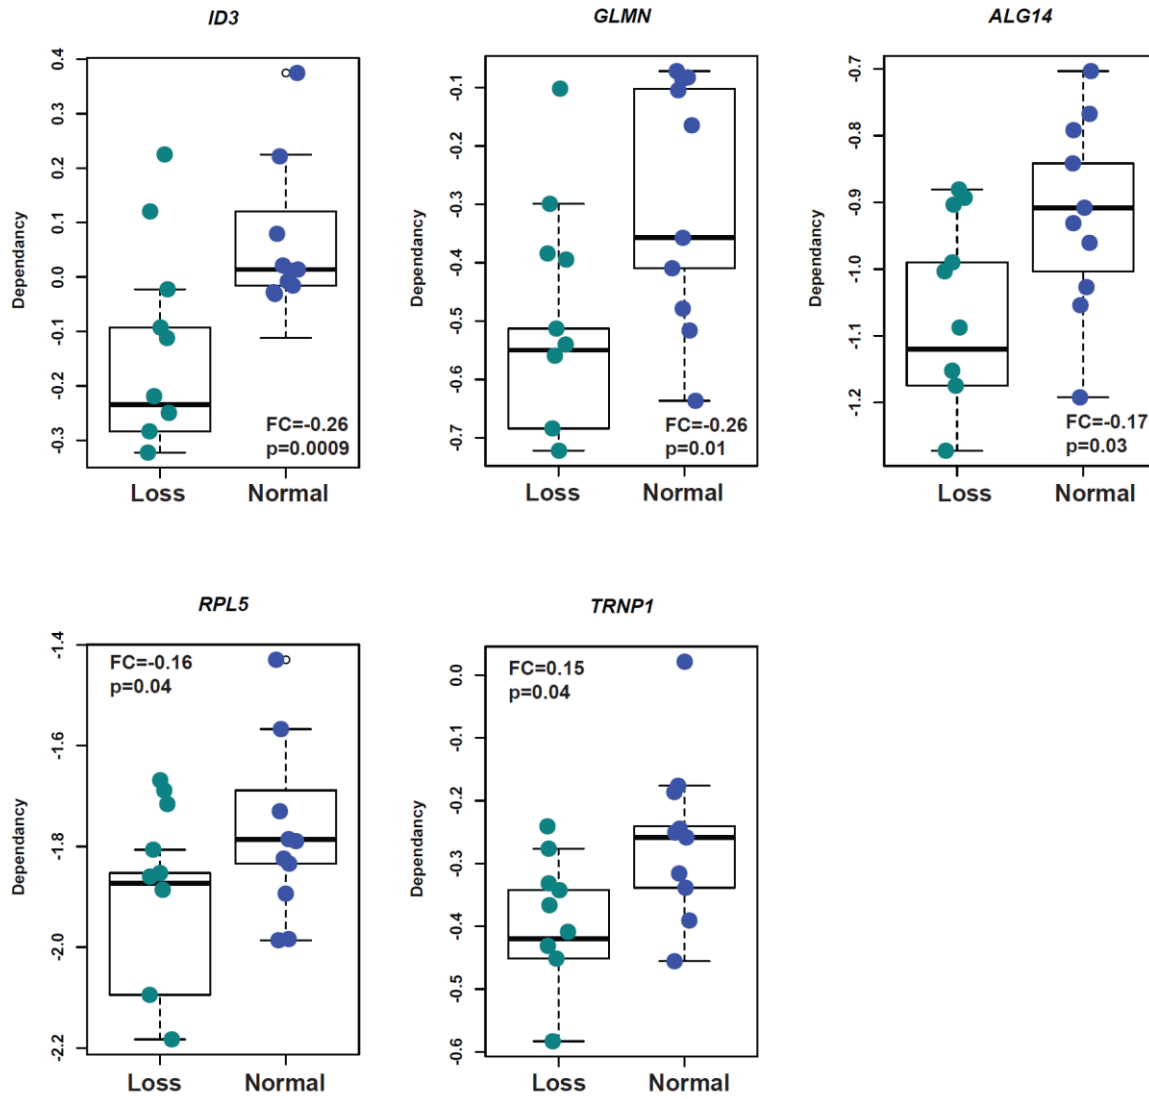

**Supplemental Figure 15.** Genes with increased dependency in cell lines with del(1p) [part B]

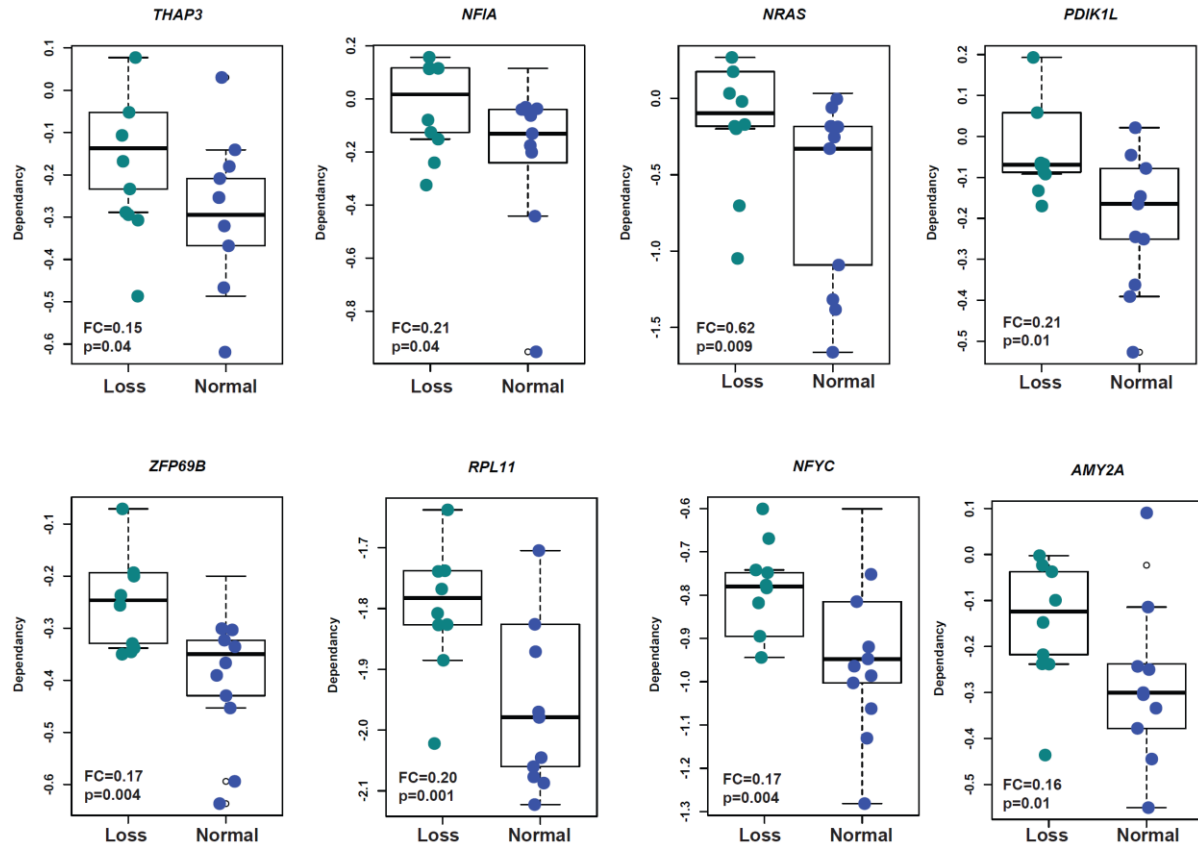

Supplement: Supplementary file 1 [file 41911484]
